# Supplementary material
Source: Springer Nature journal article supplement (https://www.springermedizin.de/resource/supplementary/12891_2007_594_MOESM5_ESM.pdf/9506296)

# Metatarsal3-5/Lateral heel Pressure-Time Integral

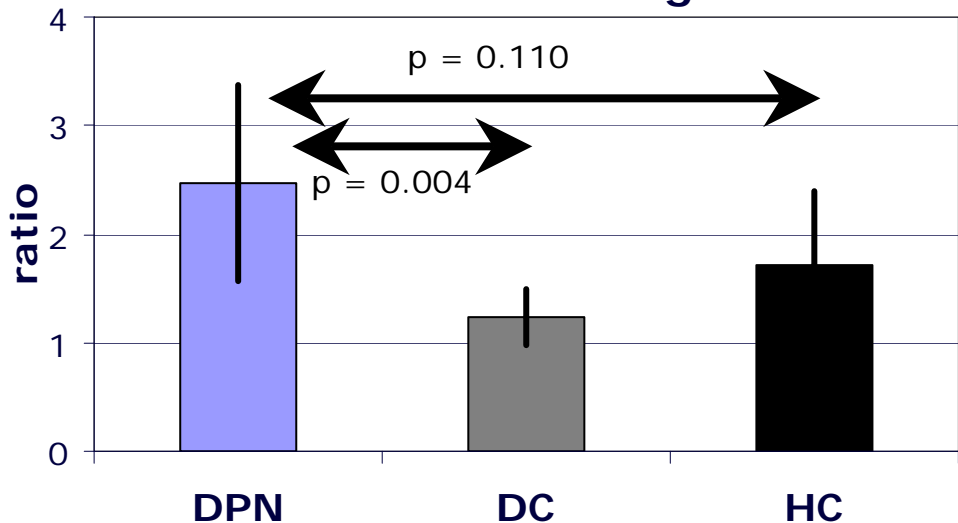

Supplement: MOESM5 [file 9506296]
